# Supplementary material for: Prenatal dietary supplements influence the infant airway microbiota in a randomized factorial clinical trial
Source: PubMed Central journal article supplement (PMC6976654; doi:10.1038/s41467-020-14308-x), 2020-01-22
Supplement: 41467_2020_14308_MOESM1_ESM.pdf [file 41467_2020_14308_MOESM1_ESM.pdf]

*Supplementary Information*

Prenatal Dietary Supplements Influence the Infant Airway

Microbiota in a Randomized Factorial Clinical Trial

**Hjelmsø et al**

**Includes:**

- Supplementary Fig. 1. Effect of fish oil (n-3 LCPUFA) and vitamin D on bacterial diversity
- Supplementary Fig 2. Effect of n-3 LCPUFA and Vitamin D prenatal dietary supplements on bacterial OTUs in the 1-month airway
  
- Supplementary Table 1. DNA amplicon sequencing summary of the individual sample types and timepoints.
- Supplementary Table 2. Blast results of reference sequences of significant OTUs from Fig S2
- Supplementary Table 3. Baseline characteristics of the nested COPSAC2010 n-3 LCPUFA and Vitamin D randomized controlled trials
- Supplementary Table 4. Mediation analysis details

## Supplementary Figures

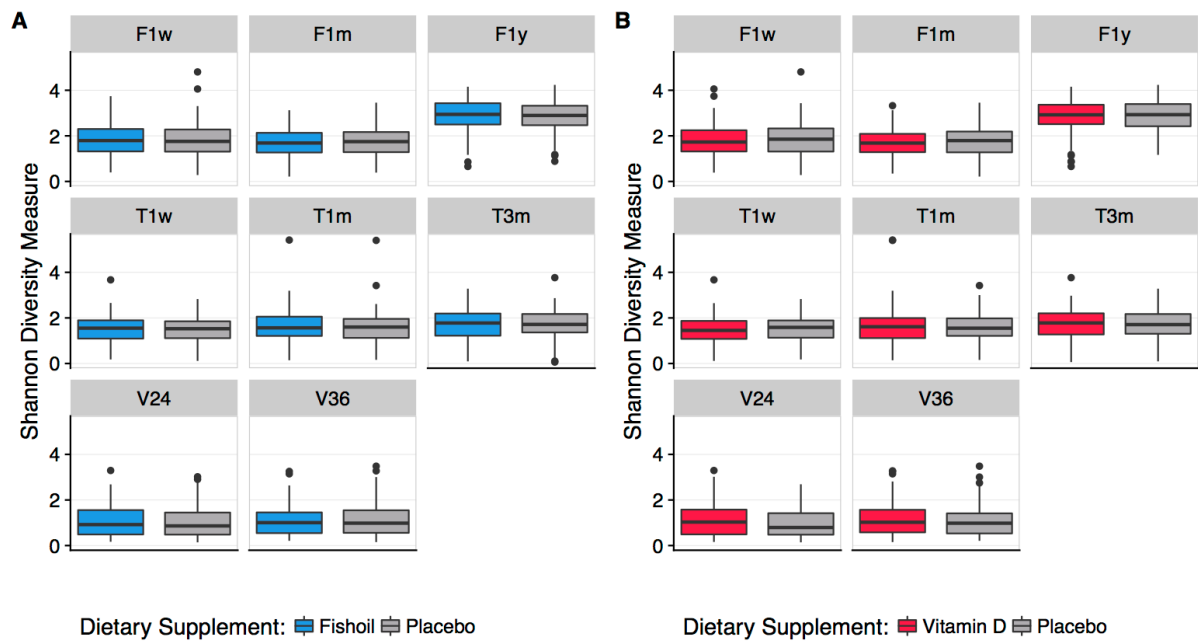

**Supplementary Fig. 1. Effect of fish oil (n-3 LCPUFA) and vitamin D on bacterial diversity.** Shannon diversity in the fecal (F), airway (T), and vagina (V) samples, taken at 1 week (1w), 1 month (1m), 1 year (1y), 24th pregnancy week (24), and 36th pregnancy week (36). No significant effect of either intervention was observed at any compartment/timepoint (Wilcoxon,  $p > 0.05$ ).

Boxplots with first and third quartiles corresponding to the lower and upper hinge, the median represented by a horizontal line, upper/lower whiskers extend to the largest/smallest value no further than  $1.5 \times$  inter-quartile range (IQR) from the hinge, and outliers are shown as black circles.  $n$ =see Supp Table 1. Source data are provided as a Source Data file.

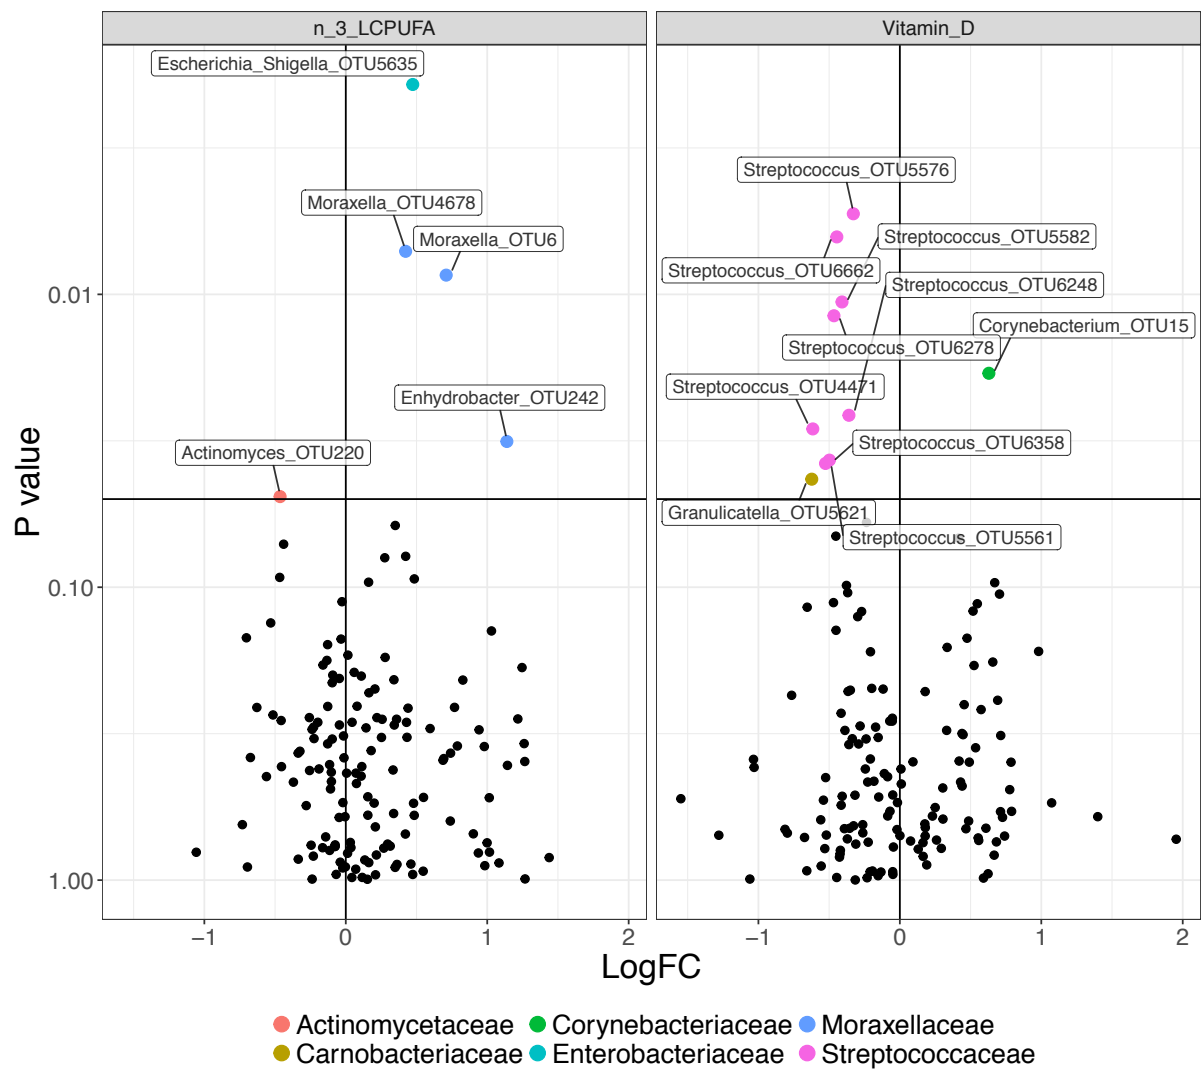

**Supplementary Fig 2. Effect of n-3 LCPUFA and Vitamin D prenatal dietary supplements on bacterial OTUs in the 1-month airway.** Volcano plots show the log fold change (FC) of each OTU as an effect of each intervention on the x-axis and the p-value from a wilcoxon test of differences in the mean relative abundance on the y-axis. Horizontal line represent the  $p < 0.05$  cutoff. Significant OTUs are colored by taxonomic Family and labelled with OTU name. No OTUs remained significant after correcting for multiple testing using a FDR threshold of 0.1.  $n = 653$  and  $541$  independent samples for the n-3 LCPUFA and Vitamin D plot, respectively. Source data are provided as a Source Data file.

## Supplementary Tables

| Sample type           | Samples | OTUs | Mean read number | Median read number |
|-----------------------|---------|------|------------------|--------------------|
| Vagina week 24        | 731     | 1846 | 50325            | 47236              |
| Vagina week 36        | 665     | 1788 | 51501            | 46996              |
| Infant feces week 1   | 552     | 2791 | 63323            | 57495              |
| Infant feces month 1  | 607     | 2450 | 57857            | 52122              |
| Infant feces year 1   | 625     | 3271 | 58147            | 56962              |
| Infant airway week 1  | 544     | 1627 | 49427            | 40824              |
| Infant airway month 1 | 645     | 2649 | 58954            | 57527              |
| Infant airway month 3 | 622     | 2098 | 49121            | 44875              |

**Supplementary Table 1. DNA amplicon sequencing summary of the individual sample types and timepoints.**

| OTU Name                            | Species_name_from_Blast                                                                            | Max score | Total score | Query cover | E value | Ident   | Accession   |
|-------------------------------------|----------------------------------------------------------------------------------------------------|-----------|-------------|-------------|---------|---------|-------------|
| <i>Actinomyces_OTU220</i>           | <i>Actinomyces graevenitzi</i> strain PCH-184 16S ribosomal RNA gene, partial sequence             | 468       | 468         | 100%        | 5E-128  | 100.00% | MF099819.1  |
| <i>Corynebacterium_OTU15</i>        | <i>Corynebacterium propinquum</i> strain L0020-06F 16S ribosomal RNA gene, partial sequence        | 468       | 468         | 100%        | 5E-128  | 100.00% | MH447030.1  |
|                                     | <i>Corynebacterium pseudodiphtheriticum</i> strain V17 2012165 16S ribosomal RNA gene, partial se  | 468       | 468         | 100%        | 5E-128  | 100.00% | KF926062.1  |
| <i>Enhydrobacter_OTU242</i>         | <i>Moraxella osloensis</i> strain CFP312 16S ribosomal RNA gene, partial sequence                  | 470       | 470         | 100%        | 1E-128  | 100.00% | MK283753.1  |
|                                     | <i>Enhydrobacter aerosaccus</i> strain BMC2N4_2 16S ribosomal RNA (16s ribosomal) gene, partial se | 470       | 470         | 100%        | 1E-128  | 100.00% | MG996857.1  |
| <i>Escherichia_Shigella_OTU5635</i> | <i>Escherichia coli</i> strain 382634_2f chromosome, complete genome                               | 468       | 3246        | 97%         | 5E-128  | 98.49%  | CP039403.1  |
|                                     | Uncultured <i>Escherichia/Shigella</i> sp. clone Otu055 16S ribosomal RNA gene, partial sequence   | 468       | 468         | 97%         | 5E-128  | 98.49%  | MF039953.1  |
| <i>Granulicatella_OTU5621</i>       | <i>Granulicatella elegans</i> strain WHMH11 16S ribosomal RNA gene, partial sequence               | 516       | 516         | 94%         | 2E-142  | 98.63%  | JN801174.1  |
| <i>Moraxella_OTU4678</i>            | <i>Moraxella bovoculi</i> strain 58086, complete genome                                            | 442       | 1769        | 100%        | 3E-120  | 98.05%  | CP011381.2  |
|                                     | <i>Moraxella lacunata</i> strain PCH-094 16S ribosomal RNA gene, partial sequence                  | 442       | 442         | 100%        | 3E-120  | 98.05%  | MF073278.1  |
|                                     | <i>Moraxella bovis</i> strain CAN11A 16S ribosomal RNA gene, partial sequence                      | 442       | 442         | 100%        | 3E-120  | 98.05%  | JN001954.1  |
| <i>Moraxella_OTU6</i>               | <i>Moraxella catarrhalis</i> strain MC8 chromosome                                                 | 468       | 1873        | 100%        | 5E-128  | 100.00% | CP010902.1  |
|                                     | <i>Moraxella nonliquefaciens</i> strain 4663/62 16S ribosomal RNA, partial sequence                | 468       | 468         | 100%        | 5E-128  | 100.00% | NR_104938.1 |
| <i>Streptococcus_OTU4471</i>        | <i>Streptococcus pneumoniae</i> isolate GPS_ZA_821-sc-1950967 genome assembly, chromosome: 1       | 520       | 520         | 95%         | 2E-143  | 99.31%  | LR536845.1  |
| <i>Streptococcus_OTU5561</i>        | <i>Streptococcus pneumoniae</i> isolate GPS_ZA_821-sc-1950967 genome assembly, chromosome: 1       | 520       | 520         | 96%         | 2E-143  | 98.97%  | LR536845.1  |
| <i>Streptococcus_OTU5576</i>        | <i>Streptococcus pneumoniae</i> isolate GPS_ZA_821-sc-1950967 genome assembly, chromosome: 1       | 503       | 503         | 93%         | 2E-138  | 99.28%  | LR536845.1  |
| <i>Streptococcus_OTU5582</i>        | <i>Streptococcus mitis</i> strain SK637 chromosome, complete genome                                | 507       | 2028        | 96%         | 1E-139  | 98.28%  | CP028415.1  |
|                                     | <i>Streptococcus oralis</i> strain 32P.4S2 16S ribosomal RNA gene, partial sequence                | 507       | 507         | 96%         | 1E-139  | 98.28%  | MK131306.1  |
| <i>Streptococcus_OTU6248</i>        | <i>Streptococcus mitis</i> strain SK637 chromosome, complete genome                                | 516       | 2065        | 96%         | 2E-142  | 99.65%  | CP028415.1  |
|                                     | <i>Streptococcus oralis</i> strain 32P.4S2 16S ribosomal RNA gene, partial sequence                | 516       | 516         | 96%         | 2E-142  | 99.65%  | MK131306.1  |
| <i>Streptococcus_OTU6278</i>        | <i>Streptococcus mitis</i> strain SK637 chromosome, complete genome                                | 490       | 1961        | 92%         | 1E-134  | 97.25%  | CP028415.1  |
|                                     | <i>Streptococcus oralis</i> strain 32P.4S2 16S ribosomal RNA gene, partial sequence                | 490       | 490         | 92%         | 1E-134  | 97.25%  | MK131306.1  |
| <i>Streptococcus_OTU6358</i>        | <i>Streptococcus australis</i> clone WWE_MCE7_17 16S ribosomal RNA gene, partial sequence          | 514       | 514         | 93%         | 8E-142  | 98.63%  | GU400321.1  |
| <i>Streptococcus_OTU6662</i>        | <i>Streptococcus pneumoniae</i> isolate GPS_ZA_821-sc-1950967 genome assembly, chromosome: 1       | 501       | 501         | 92%         | 6E-138  | 97.61%  | LR536845.1  |

**Supplementary Table 2. Blast results of reference sequences of significant OTUs from Fig S2.** The top named hit was reported, and in case of several bacterial species with identical % "query coverage" and % "identity" all were reported. Blastn was used against the default NCBI nr/nt database.

| Category                         | variable                         | 0             | 1             | 2             |
|----------------------------------|----------------------------------|---------------|---------------|---------------|
|                                  | n                                | 150           | 287           | 143           |
| <b>Socioeconomics (maternal)</b> | <b>Age</b>                       | 31.91 (4.51)  | 32.44 (4.22)  | 32.26 (4.37)  |
|                                  | <b>Level of education:</b>       |               |               |               |
|                                  | <b>Low</b>                       | 15 (10.0)     | 18 ( 6.3)     | 12 ( 8.4)     |
|                                  | <b>Medium</b>                    | 96 (64.0)     | 194 (67.6)    | 84 (58.7)     |
|                                  | <b>High</b>                      | 39 (26.0)     | 75 (26.1)     | 47 (32.9)     |
|                                  | <b>Income level:</b>             |               |               |               |
|                                  | <b>Low</b>                       | 14 ( 9.3)     | 27 ( 9.4)     | 13 ( 9.1)     |
|                                  | <b>Medium</b>                    | 82 (54.7)     | 153 (53.3)    | 69 (48.3)     |
|                                  | <b>High</b>                      | 54 (36.0)     | 107 (37.3)    | 61 (42.7)     |
| <b>During pregnancy</b>          | <b>Cat or dog in home</b>        | 61 (40.9)     | 87 (30.6)     | 45 (31.9)     |
|                                  | <b>Antibiotic use</b>            | 55 (36.7)     | 99 (34.5)     | 51 (35.9)     |
|                                  | <b>Serum vitamin D</b>           | 77.48 (25.49) | 77.75 (26.45) | 73.35 (22.76) |
| <b>Child</b>                     | <b>Sex (male)</b>                | 75 (50.0)     | 155 (54.0)    | 68 (47.6)     |
|                                  | <b>Race (caucasian)</b>          | 143 (95.3)    | 276 (96.2)    | 137 (95.8)    |
|                                  | <b>Season of birth:</b>          |               |               |               |
|                                  | <b>winter</b>                    | 58 (38.7)     | 98 (34.1)     | 53 (37.1)     |
|                                  | <b>spring</b>                    | 26 (17.3)     | 58 (20.2)     | 22 (15.4)     |
|                                  | <b>summer</b>                    | 31 (20.7)     | 58 (20.2)     | 30 (21.0)     |
|                                  | <b>fall</b>                      | 35 (23.3)     | 73 (25.4)     | 38 (26.6)     |
|                                  | <b>Duration of breastfeeding</b> | 245 (133)     | 246 (170)     | 239 (156)     |
| <b>Birth</b>                     | <b>Preterm delivery</b>          | 6 ( 4.0)      | 8 ( 2.8)      | 5 ( 3.5)      |
|                                  | <b>Nulliparity</b>               | 78 (52.0)     | 120 (41.8)    | 63 (44.1)     |
|                                  | <b>Antibiotics to mom</b>        | 42 (28.0)     | 96 (33.8)     | 46 (32.2)     |
|                                  | <b>Antibiotics to child</b>      | 4 ( 2.7)      | 7 ( 2.5)      | 3 ( 2.1)      |
|                                  | <b>Hospitalised</b>              | 13 ( 8.7)     | 29 (10.1)     | 12 ( 8.4)     |
|                                  | <b>Delivery:</b>                 |               |               |               |
|                                  | <b>acute CS</b>                  | 14 ( 9.3)     | 38 (13.2)     | 20 (14.0)     |
|                                  | <b>vaginal</b>                   | 122 (81.3)    | 220 (76.7)    | 109 (76.2)    |
|                                  | <b>planned CS</b>                | 14 ( 9.3)     | 29 (10.1)     | 14 ( 9.8)     |

**Supplementary Table 3. Baseline characteristics of the nested COPSAC2010 n-3 LCPUFA and Vitamin D randomized controlled trials.** In this table grouped as zero (placebo/placebo), one (n-3 LCPUFA/placebo or placebo/Vitamin D), and two (n-3 LCPUFA/Vitamin D) interventions. Percentages or standard deviations in parenthesis. No significant allocation differences were observed (chi-sq or t-test,  $p < 0.05$ ),

|                                 | Estimate      | 95% CI Lower   | 95% CI Upper | p-value      |
|---------------------------------|---------------|----------------|--------------|--------------|
| <i>n3-LCPUFA @ 5y</i>           |               |                |              |              |
| ACME (average)                  | -417          | -1250          | 52.22        | 0.090        |
| ADE (average)                   | -4160         | -10900         | -176.73      | 0.035 *      |
| <b>Prop. Mediated (average)</b> | <b>0.09</b>   | <b>-0.03</b>   | <b>0.47</b>  | <b>0.112</b> |
| <i>Vitamin D @ 3y</i>           |               |                |              |              |
| ACME (average)                  | -37.7         | -135           | 15.77        | 0.21         |
| ADE (average)                   | -438          | -1420          | 237.63       | 0.27         |
| <b>Prop. Mediated (average)</b> | <b>0.0548</b> | <b>-0.719</b>  | <b>0.88</b>  | <b>0.39</b>  |
| <i>Additive model @ 5y</i>      |               |                |              |              |
| ACME (average)                  | 227.33        | -32.41         | 663.53       | 0.101        |
| ADE (average)                   | 2870.95       | 459.88         | 5736.42      | 0.019 *      |
| <b>Prop. Mediated (average)</b> | <b>0.0665</b> | <b>-0.0175</b> | <b>0.33</b>  | <b>0.110</b> |

**Supplementary Table 4. Mediation analysis details.** In order to estimate the extent of asthma reduction from the individual interventions (n-3LCPUFA at 5 years and Vitamin D at 3 years) that could be mediated via 1-month airway microbiota modulations, parametric survival regression models, modeling time to asthma onset, were built using the intervention and the first PCoA component from weighted UniFrac distances as covariates. The (average) direct effect (ADE) reflects the part of the intervention which cannot be explained by microbiota alterations leading to differential frequency of asthma, and the (average) causal mediated effect (ACME), which is the intervention effect causing microbiota changes eventually leading to different frequency of asthma. The proportion of the ACME effect in relation to the total intervention effect, in a simple metric, reflects the proportion of the intervention clinical effect on asthma mediated through the airway microbiota.
